# Supplementary material for: Cell motility, contact guidance, and durotaxis
Source: Royal Society of Chemistry journal article supplement (doi:10.1039/c8sm02564a), 2019-01-01
Supplement: c8sm02564a1.pdf [file c8sm02564a1.pdf]

## Supplementary Materials

Jingchen Feng, Herbert Levine, Xiaoming Mao and Leonard M. Sander

May 10, 2018

### 1 Understanding cell migration with a Fokker-Planck equation

The distribution of cell orientation  $\theta$  (Figure 9(a)-(c)) shows two peaks in the probability density function. This indicates that the cell prefers to move either way along the stretching direction,  $\theta = \pm\pi/2$ . We can therefore propose a Langevin equation for  $\theta$ :

$$\frac{d\theta(t)}{dt} = -N_{fiber}k_c \sin(2\theta(t) - 2\theta_0) + \eta(t) \quad (1)$$

where  $\theta(t)$  is the orientation of the cell at time  $t$ ,  $\theta_0 = \pi/2$  which is the fiber alignment direction,  $\eta$  a white noise, and  $k_c$  is a coupling strength between the cell moving direction (orientation) and fiber alignment. The strength of the white noise is defined by  $\langle \eta(t)\eta(t') \rangle = 2B\delta(t - t')$ . The corresponding Fokker-Planck equation is:

$$\frac{\partial \rho(\theta, t)}{\partial t} = \frac{\partial}{\partial \theta} [N_{fiber}k_c \sin(2\theta(t) - 2\theta_0)\rho(\theta, t)] \quad (2)$$

$$+ B \frac{\partial^2 \rho(\theta, t)}{\partial \theta^2} \quad (3)$$

The steady state solution is:

$$\rho(\theta) = \exp(N_{fiber}k'_c \cos(2\theta - 2\theta_0))/const \quad (4)$$

Here  $k'_c = k_c/B$ . We can try to fit the distribution of the cell orientation with Eq. (4) by tuning  $k'$ .

As we can see in Figure 9 a-c, Eq. (4) is consistent with the distribution obtained from simulations. We can further calculate the nematic order of the cell orientation  $N_{cell} = \langle \cos(2\theta - 2\theta_0) \rangle$ :

$$N_{cell} = \int_{-\pi}^{\pi} \cos(2\theta - 2\theta_0)\rho(\theta)d\theta \quad (5)$$

$$= \int_{-\pi}^{\pi} \cos(2\theta) \exp(N_{fiber}k'_c \cos(2\theta))d\theta/C \quad (6)$$

where  $C$  is a normalization constant. For small strain  $\epsilon$ , the fiber alignment is weak, hence:

$$C \approx \int_{-\pi}^{\pi} (1 + N_{fiber}k'_c \cos(2\theta)) d\theta = 2\pi \quad (7)$$

Similarly,

$$N_{cell} \approx \int_{-\pi}^{\pi} \cos(2\theta)[1 + N_{fiber}k'_c \cos(2\theta)]d\theta \quad (8)$$

$$= \int_{-\pi}^{\pi} N_{fiber}k'_c \cos^2(2\theta)d\theta = N_{fiber}k'_c\pi / const \quad (9)$$

$$= N_{fiber}k'_c/2 \quad (10)$$

This shows that the initial slope of the curve  $N_{cell}$  vs.  $N_{fiber}$  should be  $k'_c/2$ . Indeed, the same slope obtained from simulation is quite close to the predicted  $k'_c/2 = 5.5$  (Figure 9d).

As we have seen above, the Langevin equation with a first order coupling between cell orientation and fiber alignment can match the simulation results very well. Although the Langevin equation and Fokker-Planck equation completely leave out the mechanical details, they present a useful picture of the role of contact guidance in the cell migration. .

## 2 Addiitonal example of creating stiffness gradient by spatially varying $p$

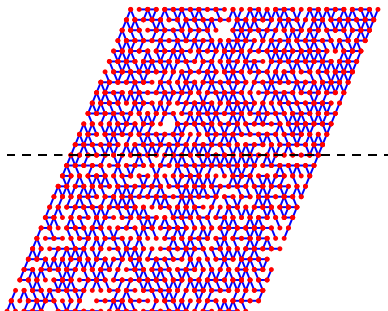

Figure 1: Fibrous network case.  $p_{upper} = 0.60$  and  $p_{lower} = 0.55$  The dashed line shows the location of the interface. In this network setting, it is very hard to distinguish the  $p$  difference directly from the network's configuration, yet the cell is able to sense the small difference in the stiffness and move toward the stiffer direction. (Figure 7 (b) and (e) in the main text)

## 3 Parameter set

| parameter       | meaning                             | value                    |
|-----------------|-------------------------------------|--------------------------|
| $\lambda$       | contraction                         | 0.4                      |
| $k_s$           | FA spring constant                  | 0.1                      |
| $k_{-,b}$       | detachment rate on the back         | 0.02                     |
| $k_{-,f}$       | detachment rate on the front        | 0.005                    |
| $\alpha$        | off-rate parameter                  | 25                       |
| $R$             | cell radius                         | $4l_0$ (lattice spacing) |
| $k_+$           | on rate                             | 0.01                     |
| $k$             | network bond spring constant        | 1                        |
| $\kappa$        | network bending stiffness           | see the main text        |
| $p$             | network bond occupation probability | see the main text        |
| $k_m$           | maturation parameter                | 1                        |
| $f_{threshold}$ | maturation force threshold          | 0.0005                   |
